# Supplementary material for: Incidence of GLMD-Like Symptoms on Grapevines Naturally Infected by Grapevine Pinot gris virus, Boron Content and Gene Expression Analysis of Boron Metabolism Genes
Source: MDPI journal article supplement (doi:10.3390/agronomy11061020), 2021-05-21
Supplement: s1 [file s1]

# Supplementary Materials: Incidence of GLMD-Like Symptoms on Grapevines Naturally Infected by Grapevine Pinot Gris Virus, Boron Content and Gene Expression Analysis of Boron Metabolism Genes

Tomáš Kiss, Mária Kocanová, Aleš Vavříník, Dorota Tekielska, Jakub Pečenka, Eliška Haka-lová, Milan Špetík, Kateřina Štusková, Alla Eddine Mahamedi, Miroslav Baránek, Akila Berraf-Tebbal, Jana Čechová, and Aleš Eichmeier

**Supplementary Table 1.** List of primers used for GPGV detection and subsequent phylogenetic analysis.

| Gene         | Orientation | 5′–3′                  | Concentration | Reference             |
|--------------|-------------|------------------------|---------------|-----------------------|
| <i>MP/CP</i> | forward     | TGGTCTGCAGCCAGGGGACA   | 200 nM        | Morelli et al. [1]    |
|              | reverse     | TCACGACCGGCAGGGAAGGA   |               |                       |
| <i>RdRp</i>  | forward     | TGAGGCATTTCGATGTTTCCCA | 200 nM        | Saldarelli et al. [2] |
|              | reverse     | ACCCAATCAAGCCATGAACCT  |               |                       |

**Supplementary Table 2.** List of primers used for GPGV relative quantification and gene expression analyses.

| Gene           | Orientation    | 5′–3′                   | Concentration | Reference            |
|----------------|----------------|-------------------------|---------------|----------------------|
| <i>VvBOR1</i>  | forward        | CGAAGATACAAGGTGTTGGAGGA | 200 nM        |                      |
|                | reverse        | AGACCGTCTGGAACAAGGTG    |               |                      |
| <i>VvBOR2</i>  | forward        | TTGCAATGGAGGGAGAGATGG   | 200 nM        |                      |
|                | reverse        | ATGCCTAATTCACCACGGC     |               |                      |
| <i>VvNIP5</i>  | forward        | GTCCCTTCGGTCAGCATTTGG   | 300 nM        | Buoso et al. [3]     |
|                | reverse        | GCCAATTCCCCACAGCTC      |               |                      |
| <i>VvNIP6</i>  | forward        | TCCTTCTCATTCAGGGGCGT    | 200 nM        |                      |
|                | reverse        | ATCCCACTGCTCTGGTGTCG    |               |                      |
| <i>Vv60SRP</i> | forward        | TTCAATGTCGGCACCTCATA    | 300 nM        |                      |
|                | reverse        | CCTCCGATGTCTCTCTCCAG    |               |                      |
| <i>CP</i>      | forward (CPF3) | TGTCGATTCGTCAGGAGTTG    | 300 nM        | Bertazzon et al. [4] |
|                | reverse (CPR3) | GGGTAAATTGTCTCCCTGA     |               |                      |

## References

1. Morelli, M.; Catarino, A.D.M.; Susca, L.; Saldarelli, P.; Gualandri, V.; Martelli, G.P. First Report of Grapevine Pinot Gris Virus from Table Grapes in Southern Italy. *J. Plant Pathol.* **2014**, *96*, 439–439.
2. Saldarelli, P.; Giampetruzzi, A.; Morelli, M.; Malossini, U.; Pirolo, C.; Bianchedi, P.; Gualandri, V. Genetic Variability of Grapevine Pinot gris virus and Its Association with Grapevine Leaf Mottling and Deformation. *Phytopathology* **2015**, *105*, 555–563.

3. Buoso, S.; Pagliari, L.; Musetti, R.; Fornasier, F.; Martini, M.; Loschi, A.; Fontanella, M.C.; Ermacora, P. With or Without You: Altered Plant Response to Boron-Deficiency in Hydroponically Grown Grapevines Infected by Grapevine Pinot Gris Virus Suggests a Relation Between Grapevine Leaf Mottling and Deformation Symptom Occurrence and Boron Plant Availability. *Front. Plant Sci.* **2020**, *11*, 226.
4. Bertazzon, N.; Forte, V.; Filippin, L.; Causin, R.; Maixner, M.; Angelini, E. Association between genetic variability and titre of Grapevine Pinot gris virus with disease symptoms. *Plant Pathol.* **2017**, *66*, 949–959.
